# Supplementary material for: Effect of One Step Solid State Reaction Route on the Semiconductor Behavior of the Spinel (NI, Co, and Mn)O4 to Be Used as Temperature Sensor
Source: MDPI journal article supplement (doi:10.3390/s23125380), 2023-06-06
Supplement: s1 [file s1]

# ***Supporting Information***

## **Effect of One Step Solid State Reaction Route on the Semiconductor Behavior of the Spinel (Ni, Co, and Mn)O<sub>4</sub> to Be Used as Temperature Sensor**

Daehyeon Ko and Sungwook Mhin \*

Department of Advanced Materials Engineering, Kyonggi University, Suwon 16227, Korea

\* Correspondence: [swmhin@kgu.ac.kr](mailto:swmhin@kgu.ac.kr)

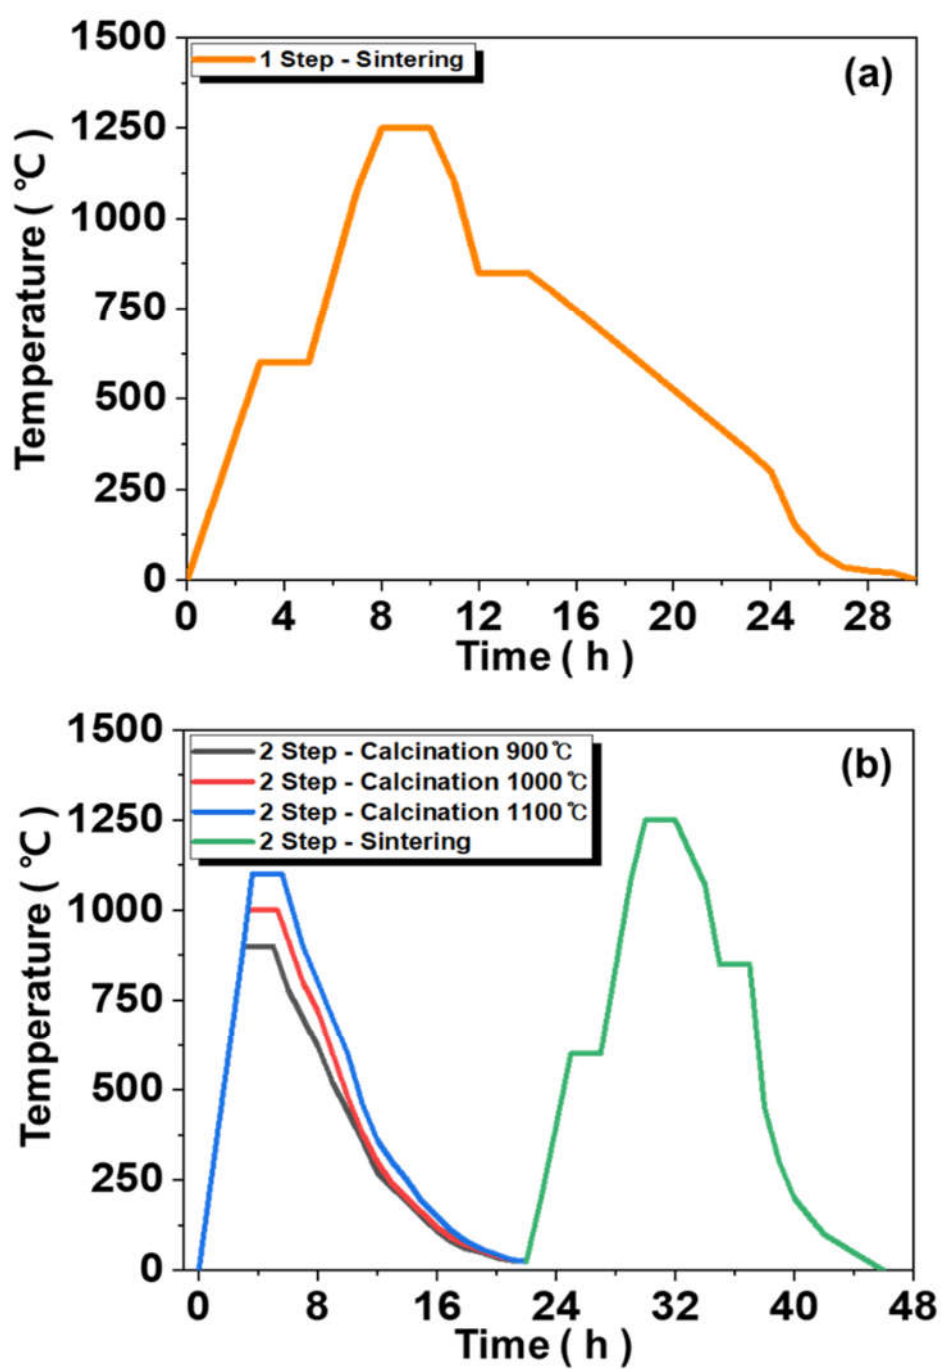

Figure S1. Heating profile of (a) 1-step SSR route and (b) 2-step SSR route.

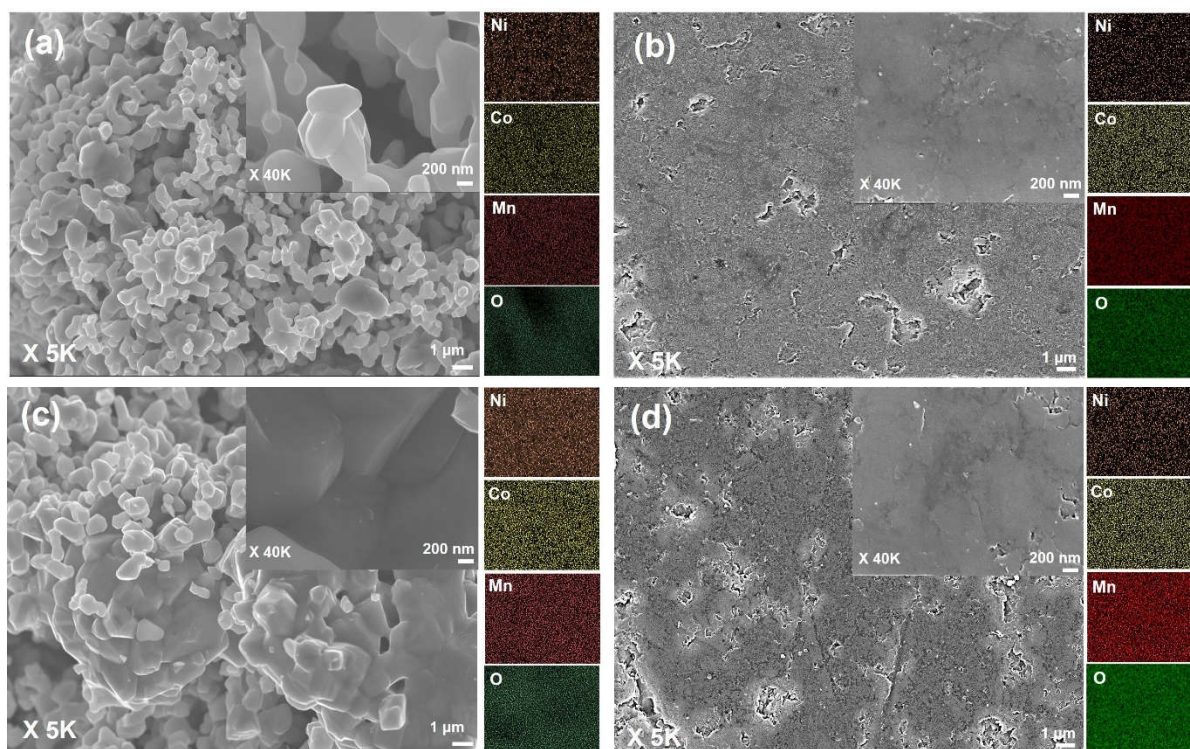

**Figure S2.** SEM images of the NMC via (a) a 2-step SSR route after calcination (900 °C) and (b) a 2-step SSR route after sintering (900 °C), and via (c) a 2-step SSR route after calcination (1000 °C) and (d) 2-step SSR route after sintering (1000 °C).

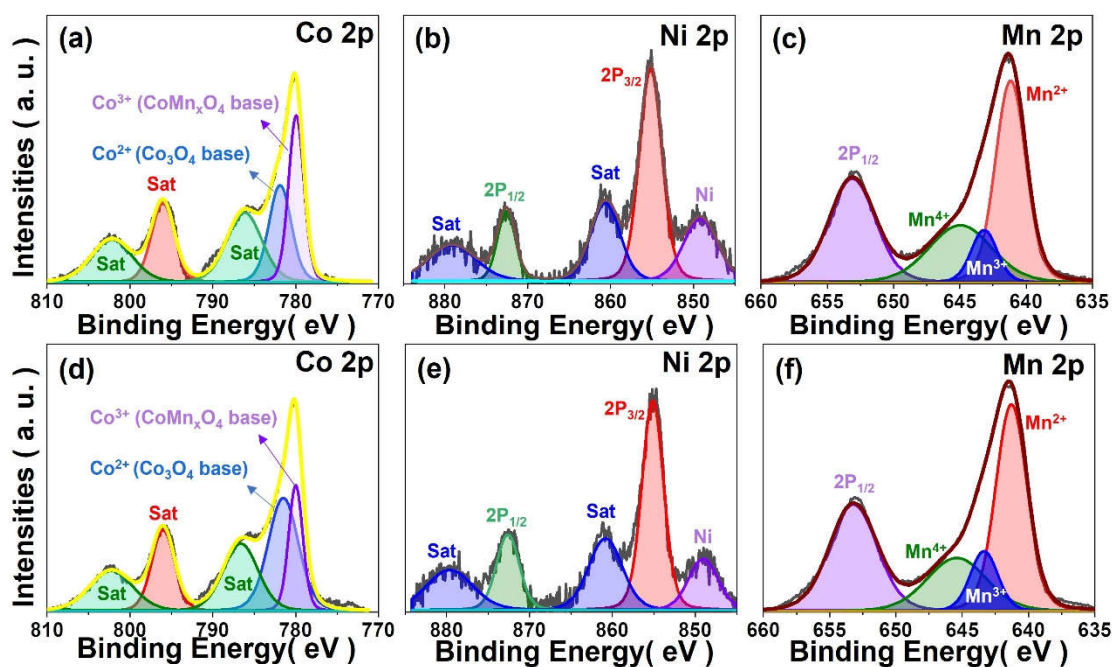

**Figure S3.** XPS spectra of (a)Co 2p (b)Ni 2p (c)Mn 2p of the NMC via 2-step SSR route (calcination temperature: 900 °C), and (d)Co 2p (e)Ni 2p (c)Mn 2p of the NMC via 2-step SSR route (calcination condition: 1000 °C).

**Table S1.** The results of XPS elemental analysis for (a) Co 2p, (b) Ni 2p, and (c) Mn 2p from NMC via 2-step SSR route (calcination temperature: 1100 °C), and (d) Co 2p, (e) Ni 2p and (f) Mn 2p from NMC via 1-step SSR route.

| <b>2-Step SSR<br/>(1100 °C)</b> | <b>(a) Co 2P</b>       |                        | <b>(b) Ni 2p</b>       | <b>(c) Mn 2p</b>       |                        |                        |
|---------------------------------|------------------------|------------------------|------------------------|------------------------|------------------------|------------------------|
|                                 | <b>Co<sup>2+</sup></b> | <b>Co<sup>3+</sup></b> | <b>Ni<sup>2+</sup></b> | <b>Mn<sup>4+</sup></b> | <b>Mn<sup>3+</sup></b> | <b>Mn<sup>2+</sup></b> |
| Area(%)                         | 49.89                  | 50.11                  | 100                    | 25.95                  | 26.02                  | 48.03                  |
| <b>1-Step SSR</b>               | <b>(d) Co 2p</b>       |                        | <b>(e) Ni 2p</b>       | <b>(f) Mn 2p</b>       |                        |                        |
|                                 | <b>Co<sup>2+</sup></b> | <b>Co<sup>3+</sup></b> | <b>Ni<sup>2+</sup></b> | <b>Mn<sup>4+</sup></b> | <b>Mn<sup>3+</sup></b> | <b>Mn<sup>2+</sup></b> |
| Area(%)                         | 51.75                  | 48.25                  | 100                    | 35.22                  | 35.40                  | 29.38                  |

**Table S2.** The results of XPS elemental analysis for O 2p from NMC via (a) 2-step SSR route (calcination temperature: 1100 °C) and (b) 1-step SSR route.

|         | <b>(a) 2-step SSR (1100 °C) O 1S</b> |                      |                      | <b>(b) 1-step SSR O 1S</b> |                      |                      |
|---------|--------------------------------------|----------------------|----------------------|----------------------------|----------------------|----------------------|
|         | <b>O<sub>C</sub></b>                 | <b>O<sub>V</sub></b> | <b>O<sub>L</sub></b> | <b>O<sub>C</sub></b>       | <b>O<sub>V</sub></b> | <b>O<sub>L</sub></b> |
| Area(%) | 12                                   | 50                   | 37                   | 8                          | 55                   | 37                   |

**Table S3.** B value and resistivity ( $\rho$ ) at room temperature (25 °C) of the NMC via a 2-step SSR route and 1-step SSR route.

|                          | <b>B value</b> | <b>Resistivity ( <math>\rho</math> 25 °C )</b> |
|--------------------------|----------------|------------------------------------------------|
| 2-step Sintering 900 °C  | 3671           | 397.83                                         |
| 2-step Sintering 1000 °C | 3727           | 589.41                                         |
| 2-step Sintering 1100 °C | 3551           | 442.35                                         |
| 1-step Sintering         | 3549           | 12.05                                          |
